# Supplementary material
Source: PubMed Central journal article supplement (PMC3020716)
Supplement: supp_M110.119438_jbc.M110.119438-1.pdf [file supp_M110.119438_jbc.M110.119438-1.pdf]

## Supplemental Tables and Figure Legends

### Supplemental Table 1. Antibodies

| Antibody              | Clone/Catalog# | Source                    |
|-----------------------|----------------|---------------------------|
| Phospho-p65 (S536)    | 3033           | Cell Signaling Technology |
| Nucleophosmin         | 3542           | Cell Signaling Technology |
| p100/52               | 4882           | Cell Signaling Technology |
| RelB                  | SC-226         | Santa Cruz Biotechnology  |
| RelA/p65              | SC-372         | Santa Cruz Biotechnology  |
| I $\kappa$ B $\alpha$ | SC-371         | Santa Cruz Biotechnology  |
| p300                  | SC-584         | Santa Cruz Biotechnology  |
| RNA polymerase II     | SC-899         | Santa Cruz Biotechnology  |
| NIK                   | SC-7211        | Santa Cruz Biotechnology  |
| LT $\beta$ R          | 4H8 WH2        | Axxora                    |
| $\beta$ -tubulin      | TUB 2.1        | Sigma                     |
| $\gamma$ -tubulin     | GTU-188        | Abcam                     |

The antibodies were used at the indicated concentrations as described by the manufacturer, except for the RelB (1/1000), I $\kappa$ B $\alpha$  (1/1000), NIK (1/1000) and p65 (1/5000) antibodies.

### Supplemental Table 2. Primer sequences for Semi-quantitative RT-PCR

| Gene     | Forward                    | Reverse                        |
|----------|----------------------------|--------------------------------|
| Csf2     | 5'-GCCATCAAAGAAGCCCTGAA-3' | 5'-GCGGGTCTGCACACATGTTA-3'     |
| Ccl2     | 5'-AGGTCCCTGTCATGCTTCTG-3' | 5'-TCTGGACCCATTCTTCTTG-3'      |
| RelB     | 5'-GTCTTTCCCCACGAGGCTAT-3' | 5'-CCGTACCTGGTCATCACAGAG-3'    |
| Map3k14  | 5'-CACTCGCTTGTGAGGACA-3'   | 5'-GATCTCCCACTTCCACAGA-3'      |
| Distal   | 5'-GAGCTTCTGGAGAGGGAGGT-3' | 5'-TCCCAGGCTTAGTCTGTTGC-3'     |
| Proximal | 5'-GCCTGACAACCTGGGGGAAG-3' | 5'-TGATTAATGGTGACCACAGAACTC-3' |

Primer sequences were from reference # 10 and # 18.

### Supplemental Table 3. Oligonucleotides for Reporter synthesis

| ID   | Sequence                                   |
|------|--------------------------------------------|
| R0   | CGAGatgacgctacgaca                         |
| F0   | tgtcgtagcgtcatCTCGAGGGGCCTTTAAAGCAG        |
| R18  | CTGAGGAGGATGCGGGCTGCTTTAAAGGCCCT           |
| F35  | CCCGCATCCTCCTCAGGACCTTAGCCAGGCCT           |
| R51  | CTGCGGGCTGCTTTAAAGGCCTGGCTAAGGTC           |
| F67  | TTAAAGCAGCCCGCAGGTGGGCTGCCAGTTCTT          |
| R83  | GGGTTTTCAATTAATAAGCCCTTCCAAGAACTGGCAGCCCAC |
| F100 | GGAAGGGCTTATTAATGAAAACCCCCAAGCCTGACAACCT   |
| R124 | CCAGTGAGCCTTCCCCAGGTTGTCAGGCTTGGG          |
| F141 | GGGGGAAGGCTCACTGGCCCCATGTATAGCTGATAAGGG    |
| R158 | GAGTTGTGGAATCTCCTGGCCCTTATCAGCTATACATGGGG  |
| F180 | CCAGGAGATTCCACAACCTCAGGTAGTTCCCCCGCCC      |
| R199 | GACCACAGAACTCCAGGGGGGCGGGGGAACCTACCT       |

F216 CCCTGGAGTTCTGTGGTCACCATTAATCATTTCCTCTAACTG  
R234 ACTGCAAAAGAGCTCTTATATACACAGTTAGAGGAAATGATTAATGGT  
F258 TGTATATAAGAGCTCTTTTGCAGTGAGCCCAGTACTCAGAGAG  
R282 TCCTCAGGACCTTAGCCTTTCTCTCTGAGTACTGGGCTC  
F301 AAAGGCTAAGGTCCTGAGGAGGAAAGCTTgccaagga  
F321 tccttggcAAGCTTTCC

*XhoI and HindIII sites added to the front and end of sequence*  
Primer sequences were from reference # 13 and # 18.

### **Supplemental Figure Legends**

**Supplemental figure 1.** Induction of Csf2 transcripts by LT $\beta$ R MAb treatment following TNF priming. Cells were treated with the following conditions

1. TNF, 25 ng/ml for 1 hour
2. LT $\beta$ R, 0.5  $\mu$ g/ml for 4 hours
3. TNF', primed with TNF for 1 hour and then rested for 4 hours
4. TNF'/LT $\beta$ R, primed with TNF for 1 hour and then LT $\beta$ R for 4 hours

Complementary DNA was generated from total RNA samples and then analyzed for Csf2 transcripts by qPCR.

**Supplemental figure 2.** LT $\beta$ R priming does not increase TNF-mediated Ccl2 (A) and RelB (B) induction. Complementary DNA samples from figure 2 were analyzed for Ccl2 and RelB transcripts by qPCR.

1. TNF, 25 ng/ml for 1 hour
2. LT $\beta$ R, LT $\beta$ R MAb 0.5  $\mu$ g/ml for 4 hours
3. LT $\beta$ R'/TNF, primed with LT $\beta$ R MAb for 4 hours and then TNF for 1 hour
4. TNF', primed with TNF for 1 hour and then rested for 4 hours
5. TNF'/LT $\beta$ R, primed with TNF for 1 hour and then LT $\beta$ R for 4 hours

The p values from student T test analyses for supplemental figure 2B were 0.053 (A) and 0.6 (B).

**Supplemental Figure 3.** NIK (Map3k14) expression was required for p100 processing and LT $\beta$ R-MAb priming of TNF-mediated Csf2 expression. (A) The processing of p100 following LT $\beta$ R-treatment was inhibited in NIK knockdown cells. p100 levels in cells transfected with either the control (pLKO.1) or NIK (Map3k14 shRNA) shRNA plasmid were measured following LT $\beta$ R-MAb treatment. The results from three separate experiments were summarized in supplemental figure 3A. (B) The amount of Csf2 expression following TNF or LT $\beta$ R-MAb treatment in cells transfected with either control (pLKO.1) or NIK (Map3k14 shRNA) shRNA plasmid was measured by RT-PCR. Transfection of the human NIK (MAP3K14) expression plasmid restored LT $\beta$ R MAb priming in NIK knockdown cells. (C) Lysates from NIK knockdown cells transiently transfected with either the control (pCMV-SPORT6) or NIK (pCMV-SPORT6/MAP3K14) expression plasmid for 48 hours were immunoprecipitated and immunoblotted with the

NIK antibody. (D) The expression of the human NIK (MAP3K14) expression plasmid restored the synergistic effect of LT $\beta$ R MAb priming in TNF-mediated Csf2 transcription in NIK knockdown cells.

**Supplemental figure 4.** The detection of p100, p52, p65, and RelB in the cytoplasmic and nuclear extracts from cells treated with either vehicle (medium), TNF (25 ng/ml), or LT $\beta$ R MAb (0.5  $\mu$ g/ml) for the indicated time period. Cytoplasmic and nuclear extracts from treated cells were fractionated as described in the Materials and Methods section. The extracts were probed with the indicated antibodies. NPM and  $\beta$  tubulin served as the nuclear and cytoplasmic loading controls, respectively.

**Supplemental figure 5.** LT $\beta$ R'/TNF induced p65 DNA binding activity was specific for the NF- $\kappa$ B consensus sequence. (A) As described in the kit protocol (Active Motif), two micrograms of the nuclear extract from cells primed with LT $\beta$ R and then treated with TNF (LT $\beta$ R'/TNF) were incubated with either wild type or mutated NF- $\kappa$ B consensus sequence during the DNA binding process. (B) p65 DNA binding curves. Various amounts of nuclear extracts from treated cells were assessed for p65 DNA binding activity. The slopes of TNF and LT $\beta$ R'/TNF were 0.09 and 0.12, respectively, which suggested that the difference in p65 DNA binding activity between the two treatments was nominal.

**Supplemental Figure 6.** (A) Nuclear RelB and p65 do not associate with each other. One hundred micrograms of nuclear extract from cells primed with LT $\beta$ R-MAb (4 hr), washed, and treated with TNF (1 hr) was initially immunoprecipitated with normal rabbit Ig (2  $\mu$ g) overnight at 4°C (lane 2). Protein A/G PLUS beads (Santa Cruz Biotechnology) were added to the sample and rotated for an additional hour. The samples were centrifuged to remove the supernatant (unbound sample). The unbound sample was subsequently immunoprecipitated with two micrograms of RelB antibody for 4 hours at 4°C (lane 3). As described earlier, Protein A/G PLUS beads were added to the sample and rotated for an additional hour. The unbound sample was subsequently immunoprecipitated with two micrograms of RelB antibody at 4°C overnight (lane 4). This process was repeated however with two micrograms of p65 antibody for 4 hr (lane 5) and overnight (lane 6). The beads were washed three times with RIPA buffer and the immunoprecipitated samples were eluted from the beads with SDS sample buffer and boiling. The immunoprecipitated RelB (top) and p65 (bottom) was detected by immunoblot analysis as described in the Material and Methods section. Ten microgram of the original nuclear sample was included (input, lane 1). (B) Recruitment of p65 to the Csf2 promoter was independent of RelB. Chromatin immunoprecipitation samples (as described in figure 8C) from cells expressing either the control (pGIPZ) or RelB shRNAmir plasmid were analyzed for p65 recruitment to the Csf2 promoter after LT $\beta$ R-MAb priming and then treated with TNF.

**Supplemental Figure 7.** Recruitment of p65 and RelB to the same DNA region. An immunodepletion ChIP assay was performed as described previously (see reference 14

in text) with the following modifications. Sheared chromatin from cells primed with LT $\beta$ R MAb and then treated with TNF was initially incubated with either normal Ig, anti-p65, or anti-RelB overnight. The immunoprecipitated chromatin was depleted from the sample with the addition of Protein A/G PLUS beads (Santa Cruz). The immunodepleted chromatin samples were subsequently immunoprecipitated with the indicated antibody. The precipitated DNA was used in a PCR reaction and the PCR products were run through a DNA agarose gel.

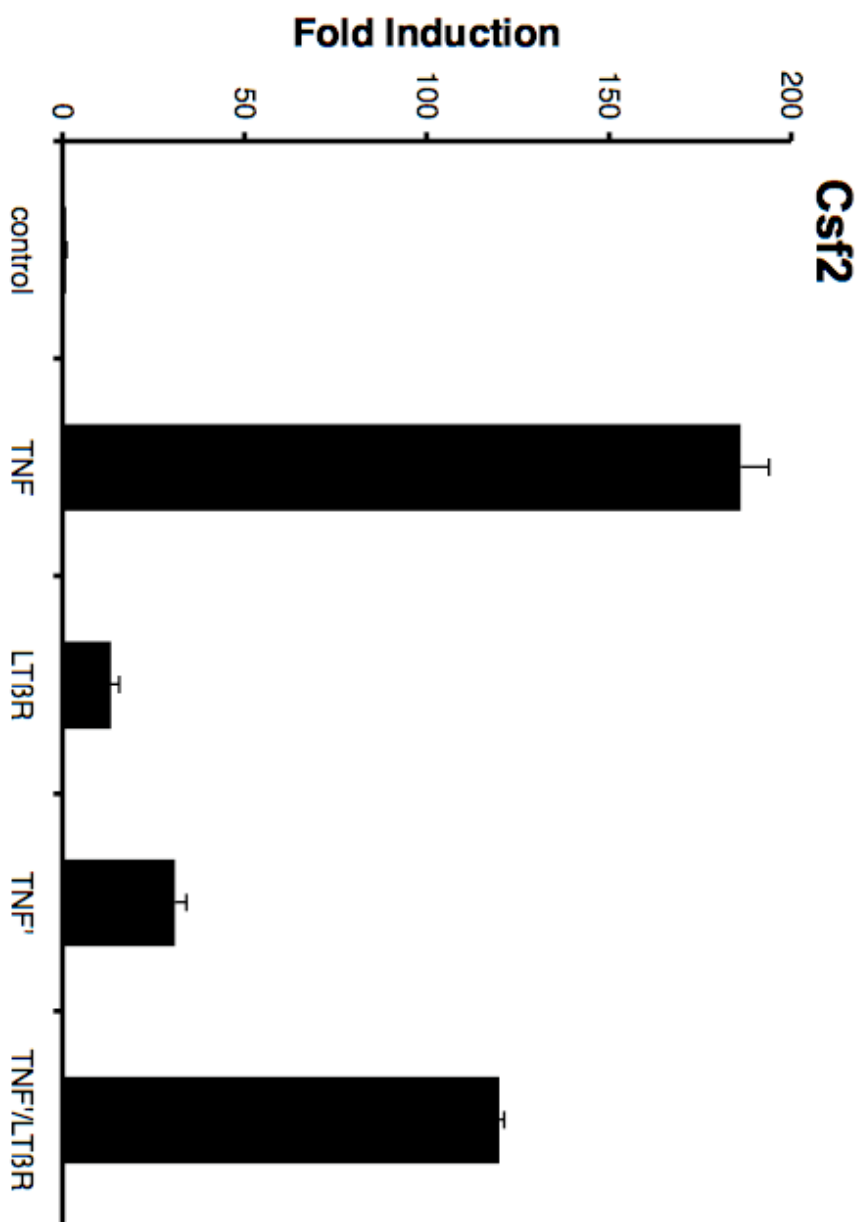

Suppl. Fig. 1

## Ccl12

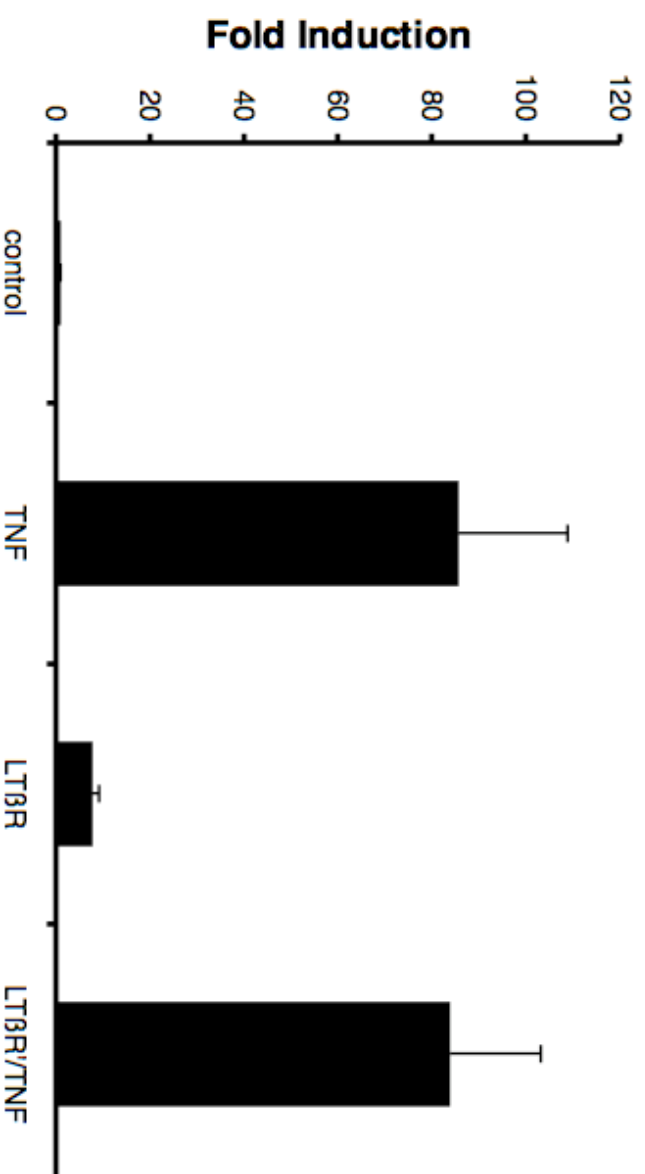

Suppl. Fig. 2A

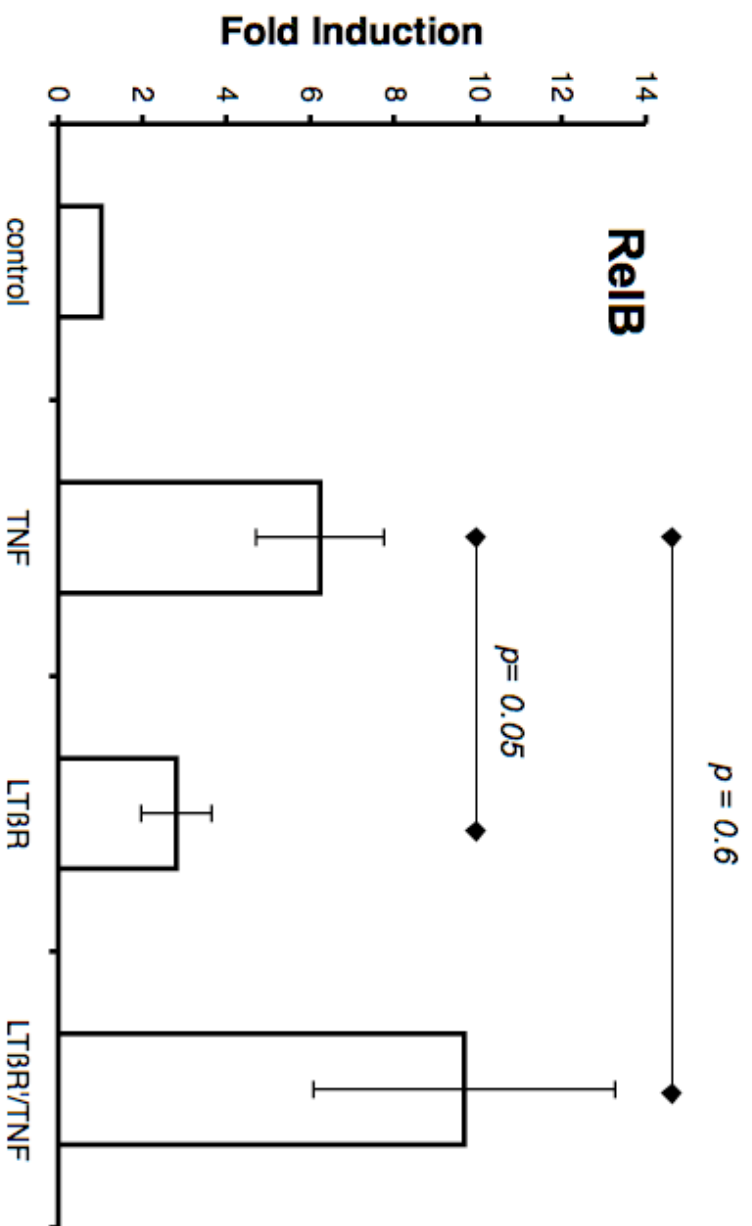

**Suppl. Fig. 2B**

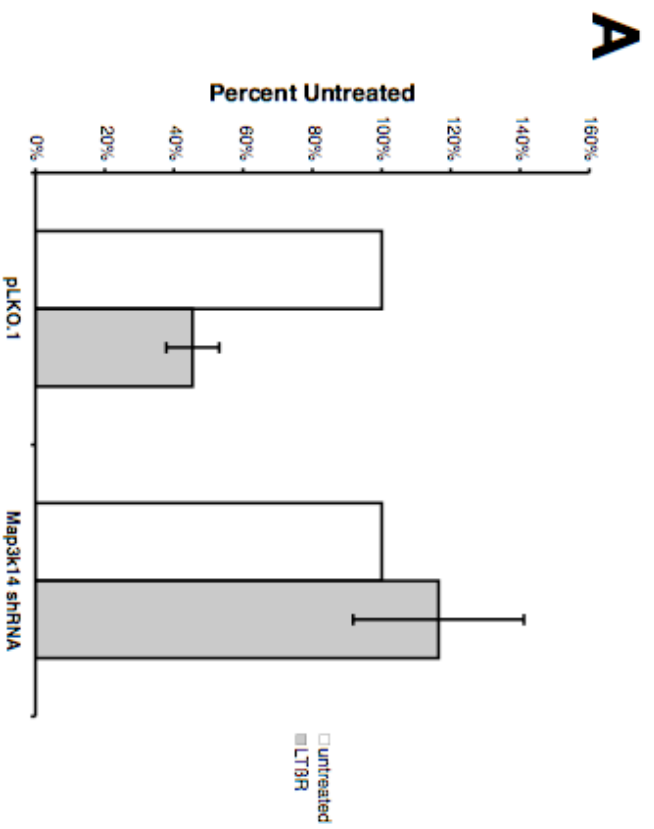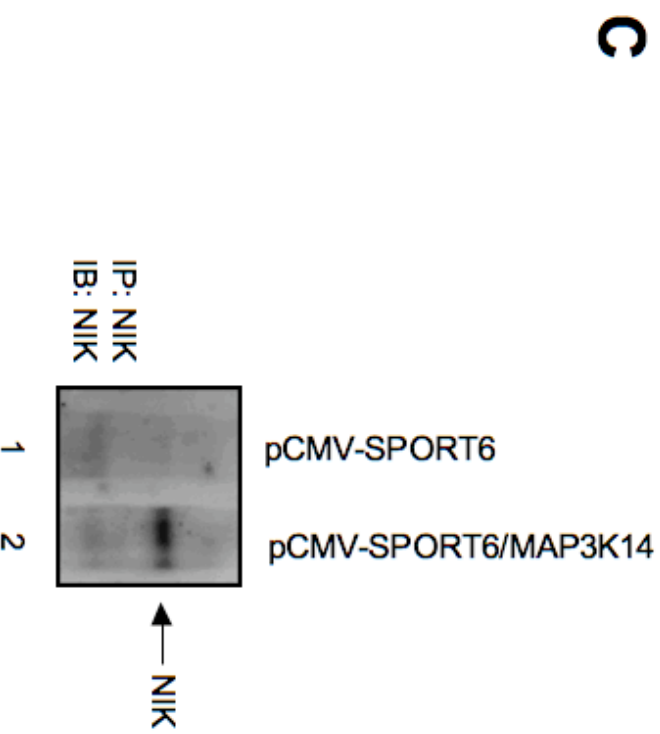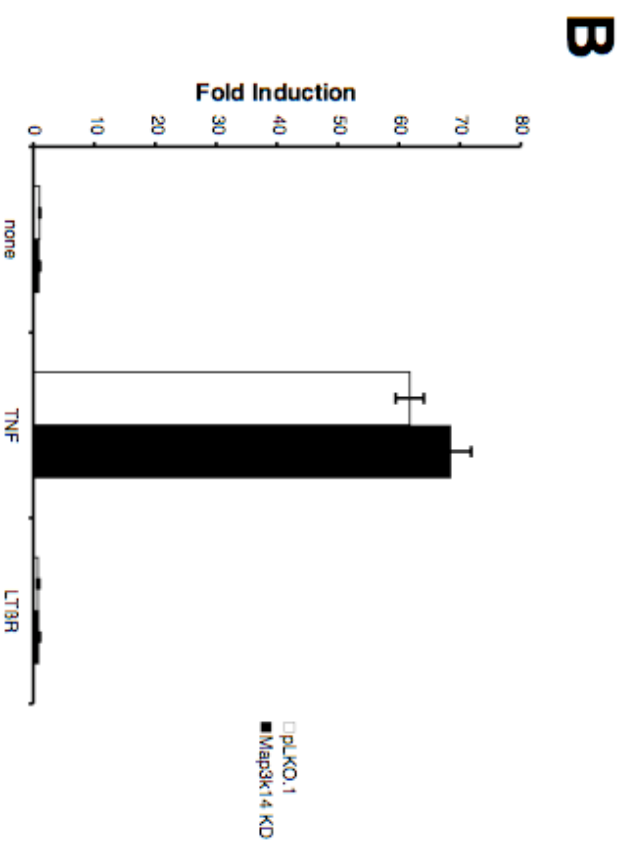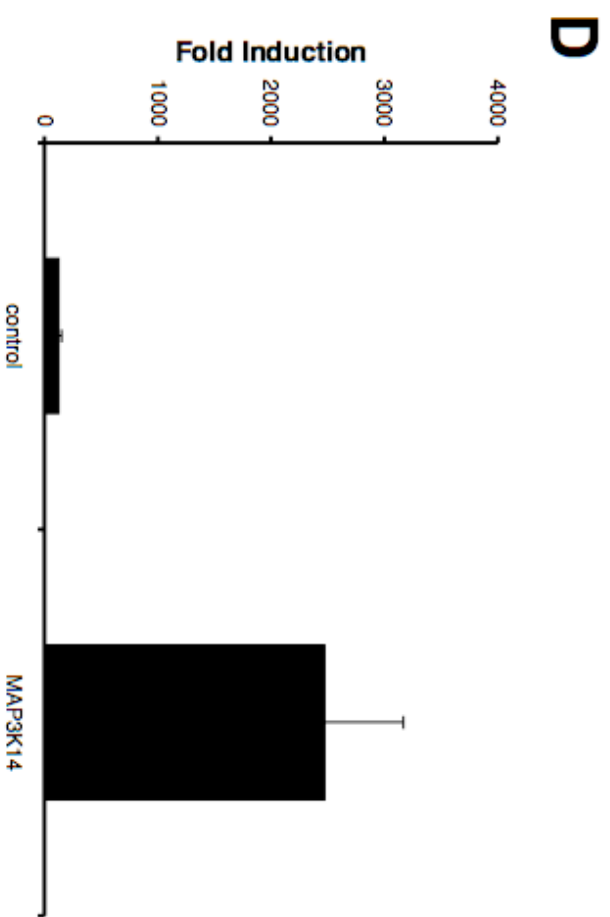

**Suppl. Fig. 3A-D**



Suppl. Fig. 4

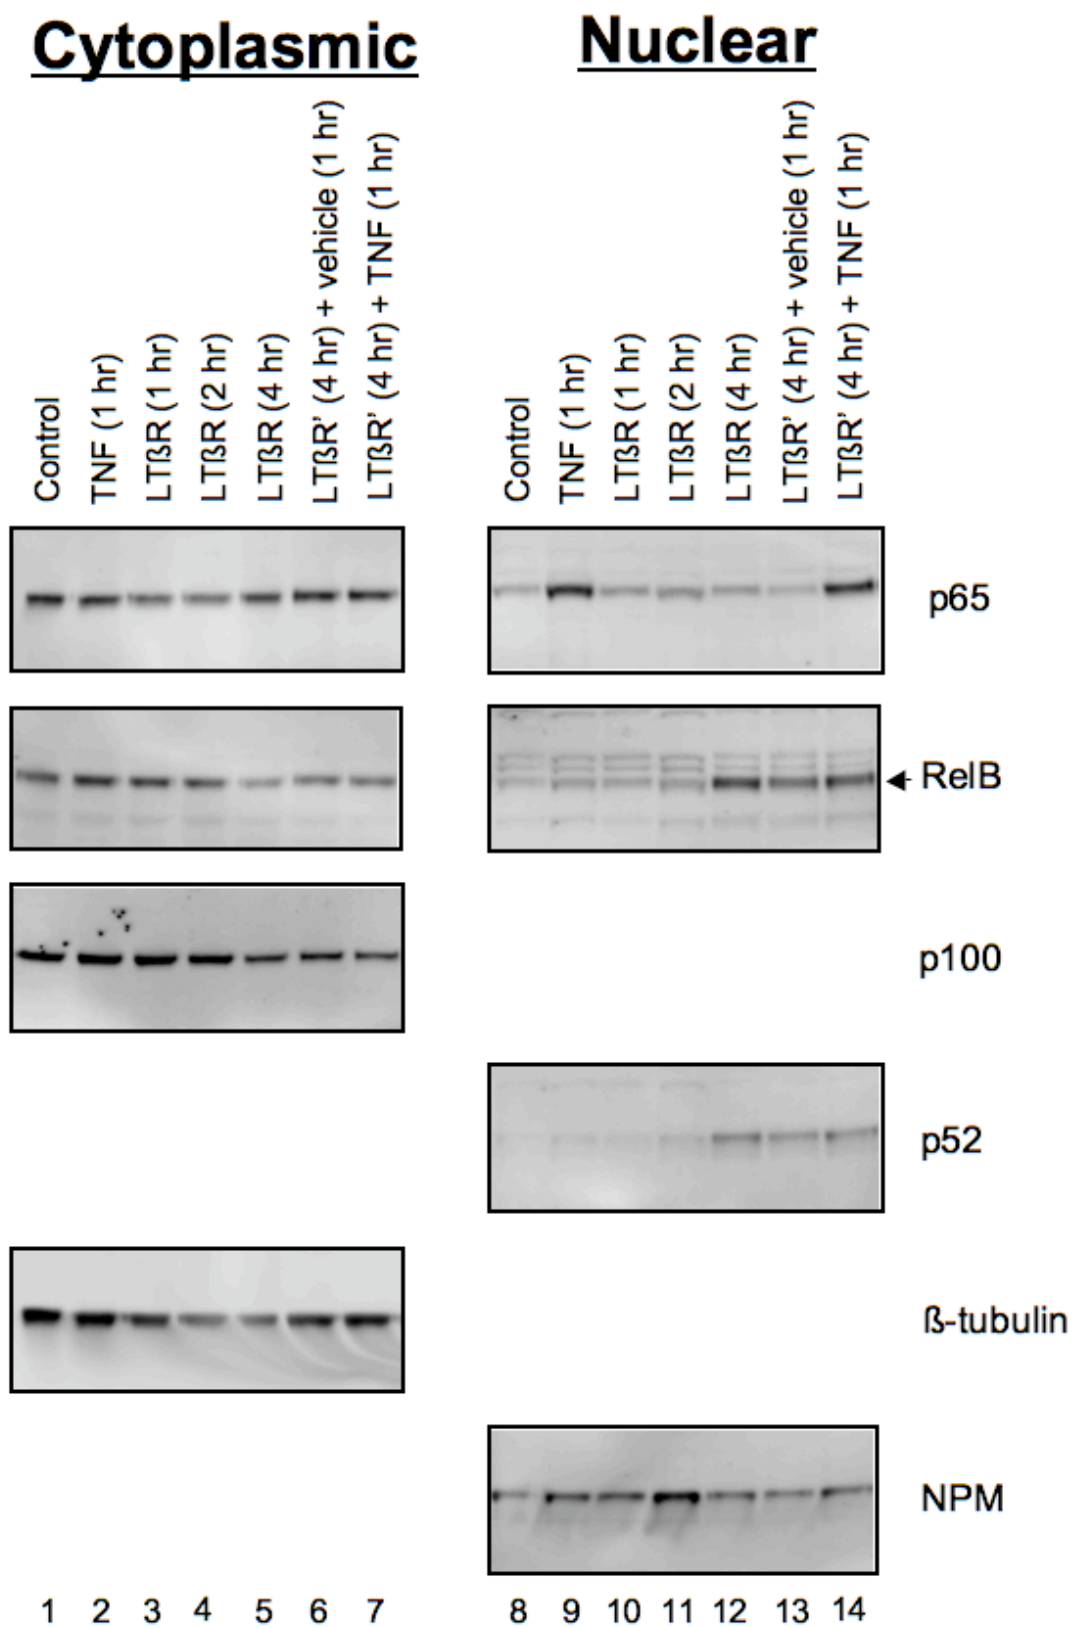

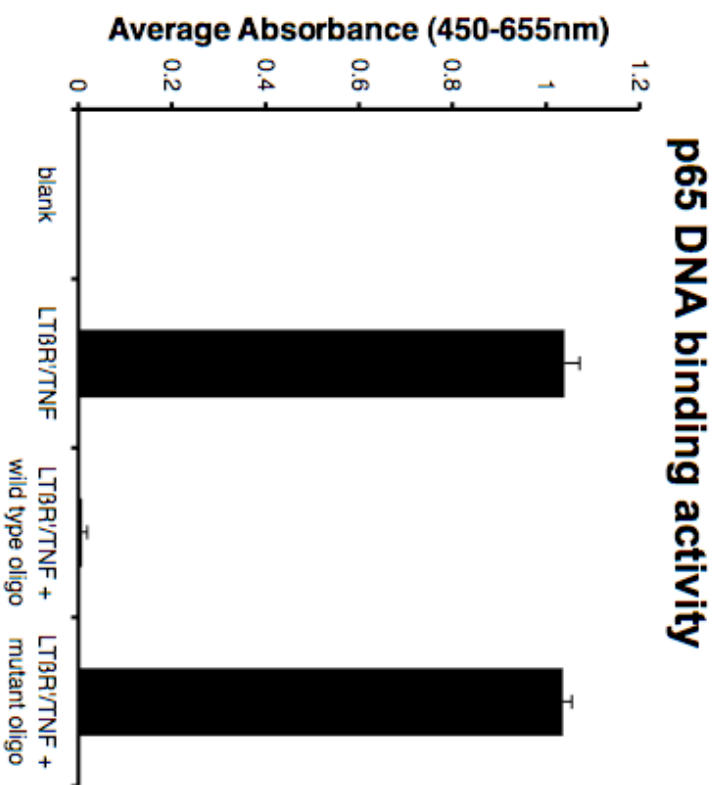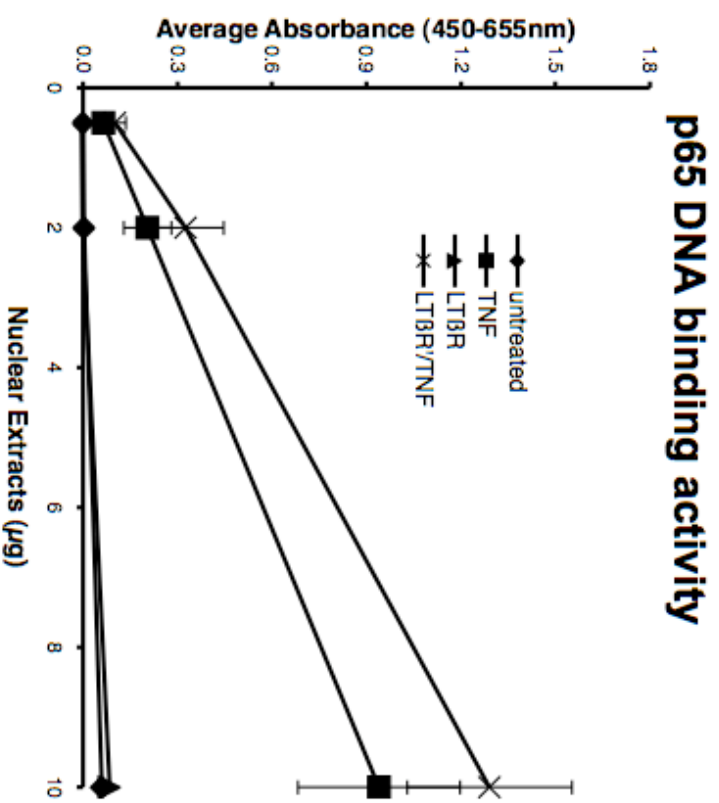

Suppl. Fig. 5

# A

## Sequential IP

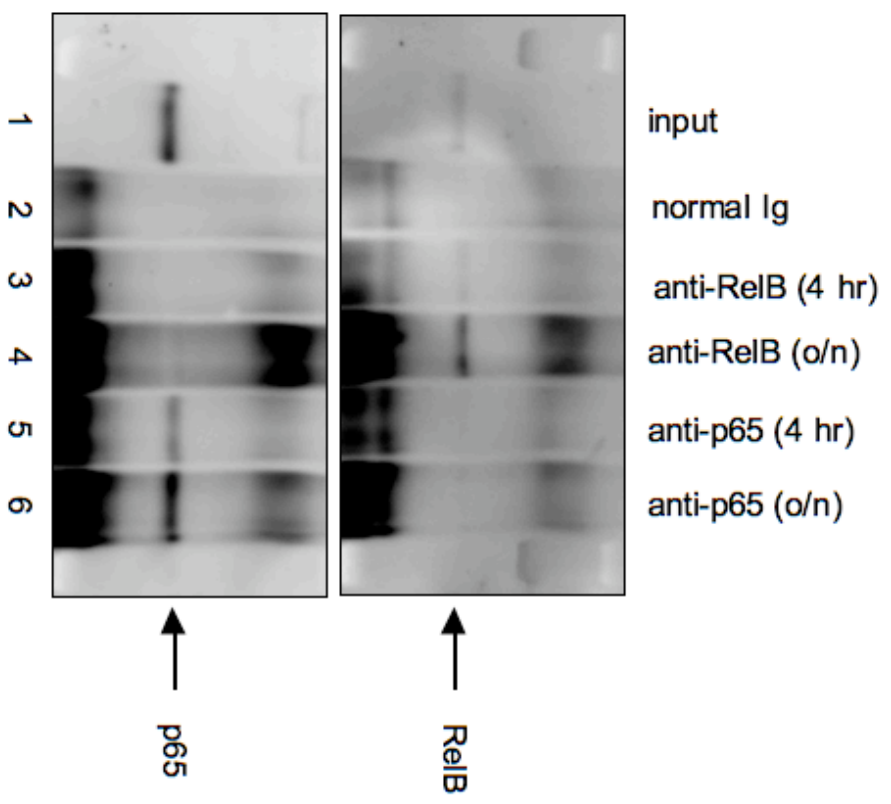

# B

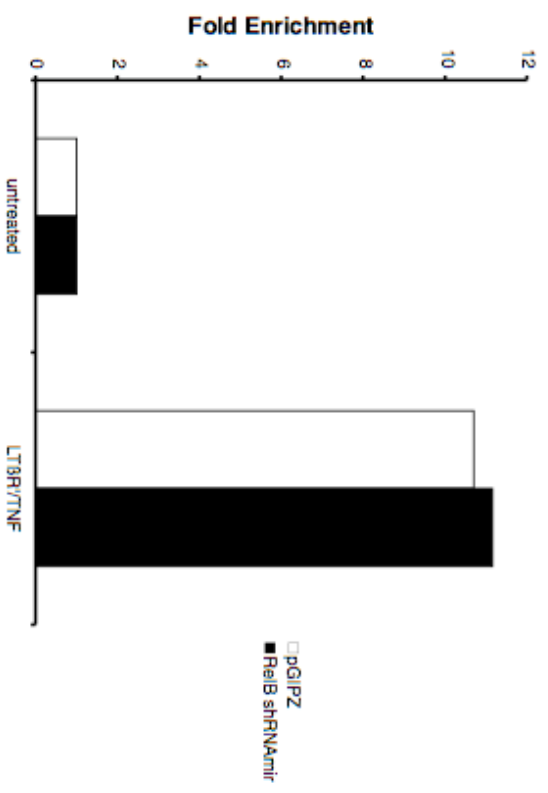

**Suppl. Fig. 6A & B**

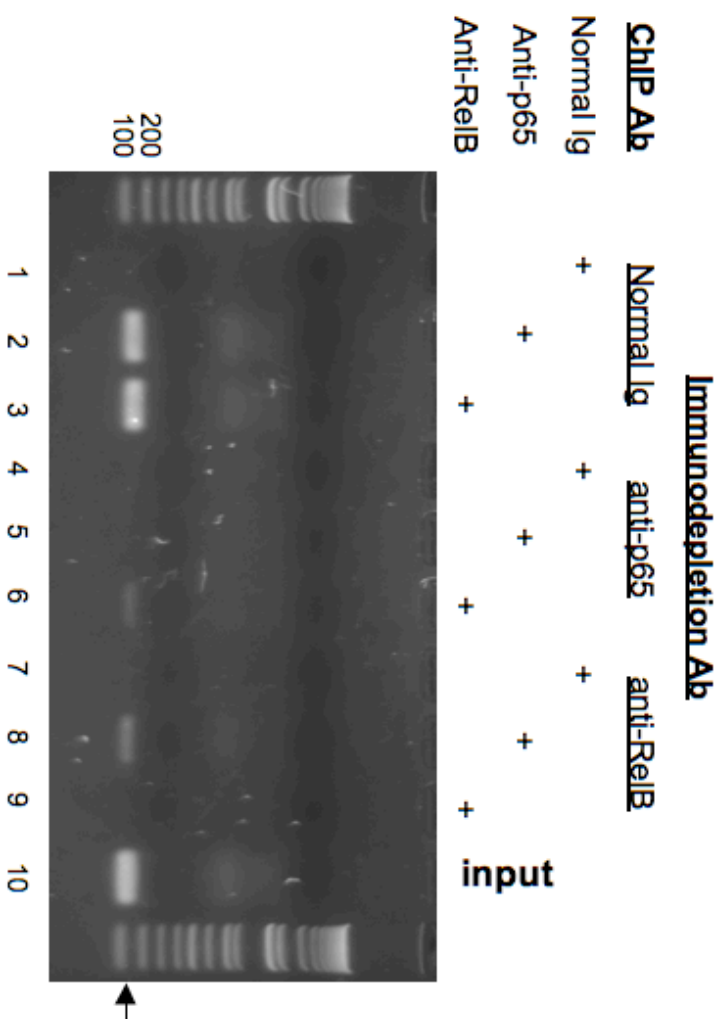

**Suppl. Fig. 7**
